# Supplementary figures and images for: Ginger-Derived 3HDT Exerts Antiproliferative Effects on Breast Cancer Cells by Apoptosis and DNA Damage
Source: MDPI journal article supplement (doi:10.3390/ijms24065741), 2023-03-17

G9-11-2

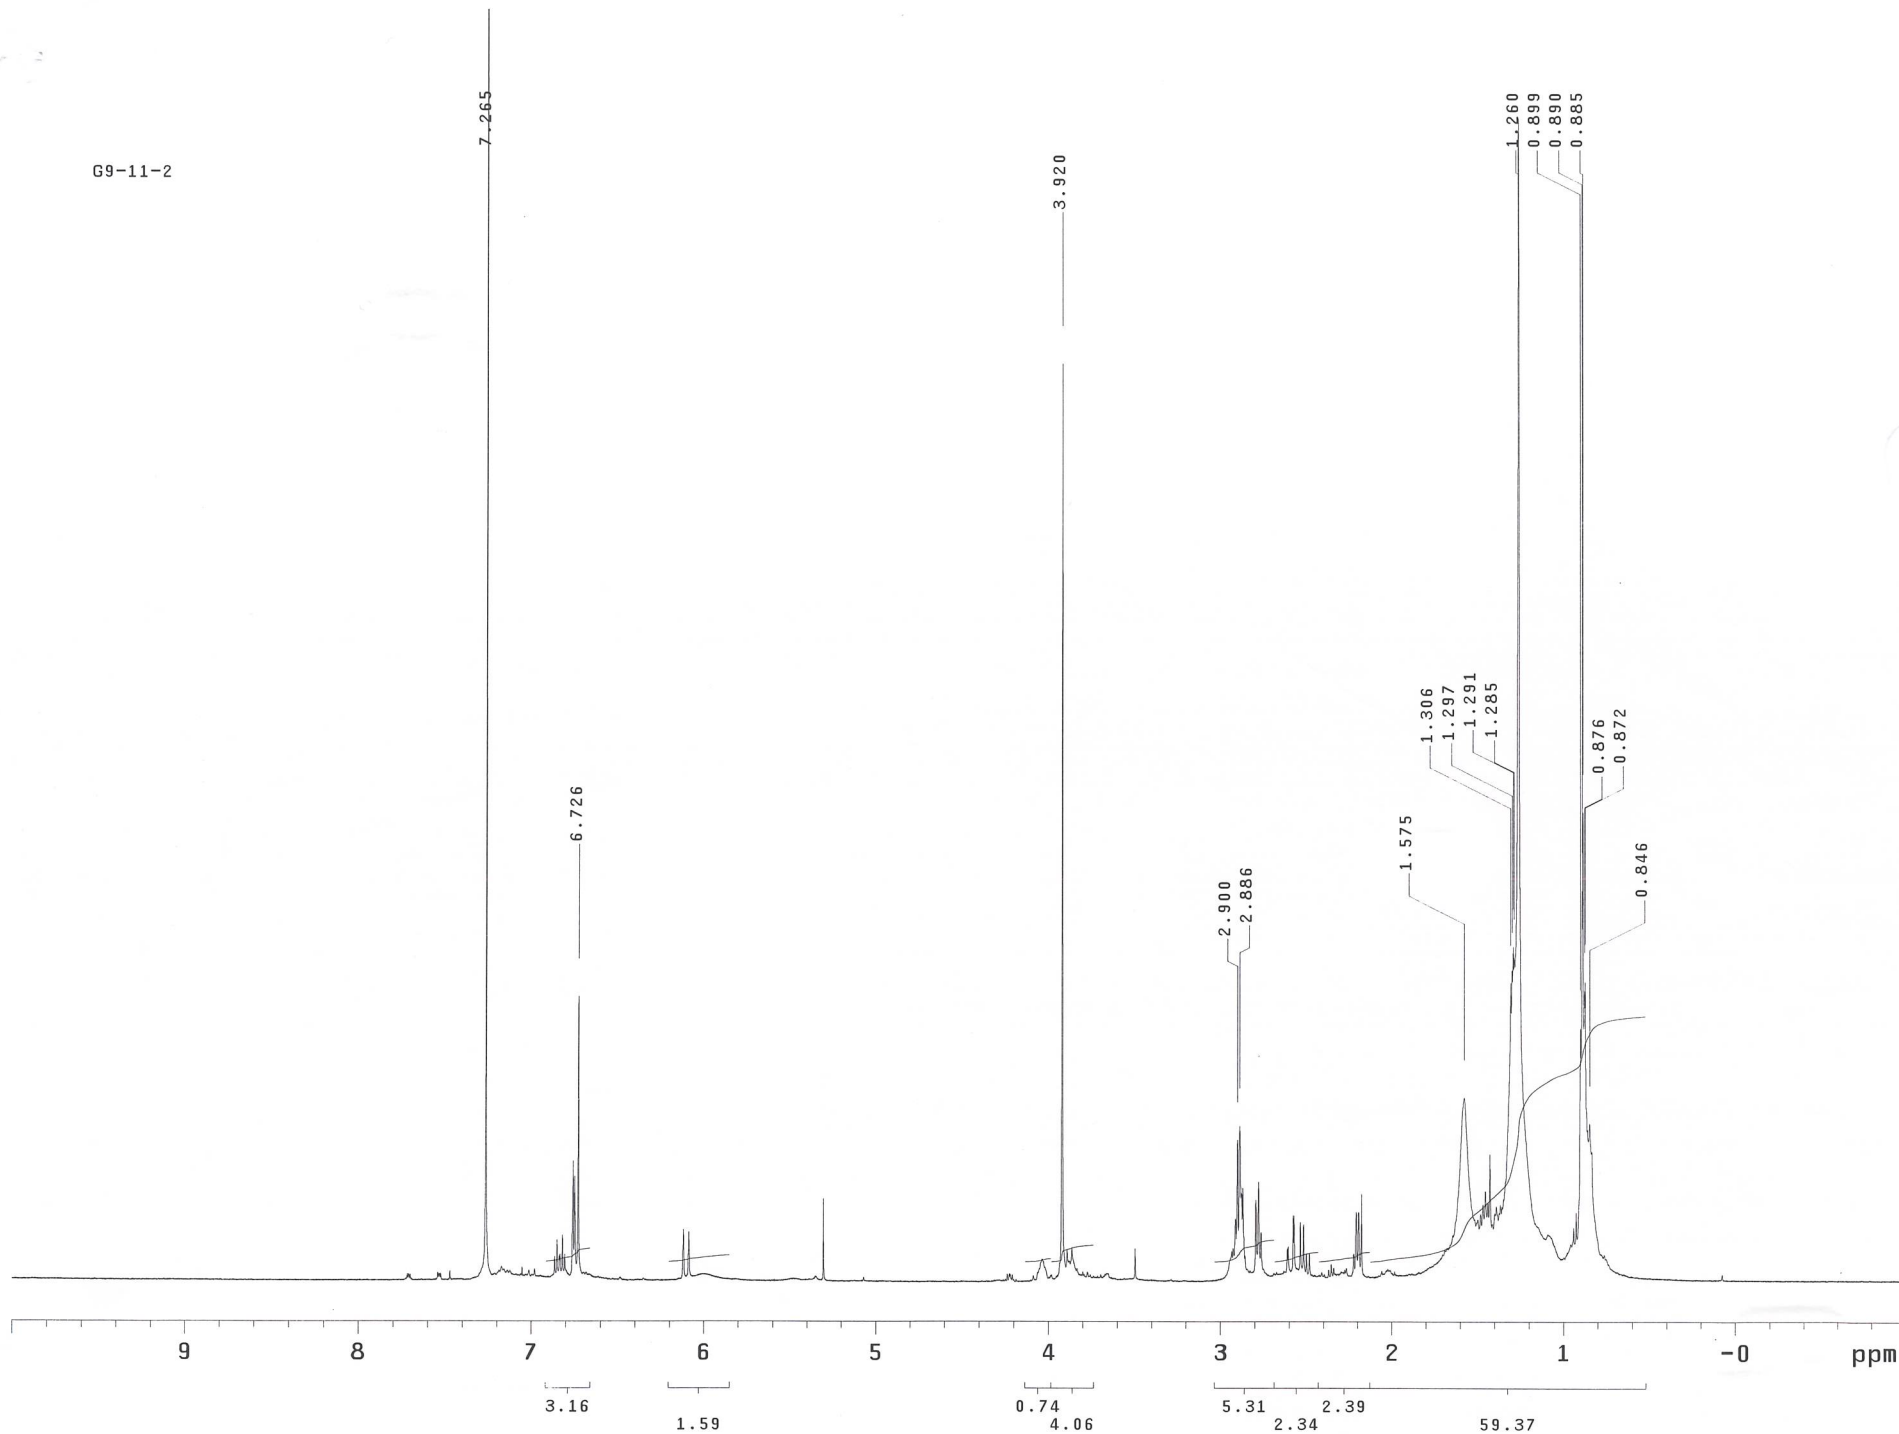

Supplement: s1 [file s1]
